# Supplementary material for: Creation of a biological sensorimotor interface for bionic reconstruction
Source: PubMed Central journal article supplement (PMC11196281; doi:10.1038/s41467-024-49580-8), 2024-06-24
Supplement: 41467_2024_49580_MOESM3_ESM.pdf [file 41467_2024_49580_MOESM3_ESM.pdf]

1 **Supplemental Material**

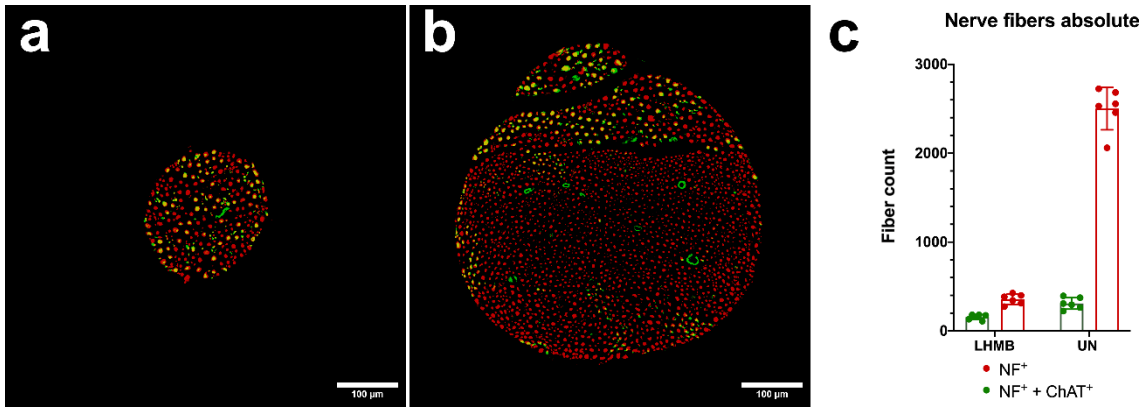

2  
3 **Supplemental Figure S1: Analysis of the involved peripheral nerves.** (n=6, biological replicates) Anti-NF/ChAT staining of the contralateral LHMB (A) and UN (B).  
4 NF (red) is a general neural marker, while ChAT (green) specifically highlights cholinergic structures. Thus, the overlay of the two (yellow) indicates efferent axons,  
5 while red axons are of afferent nature. (C) The respective peripheral nerve fiber counts (presented as mean and standard deviation). (NF = neurofilament, ChAT =  
6 choline acetyltransferase, LHMB = long head's muscle branch, UN = ulnar nerve)

7  
8

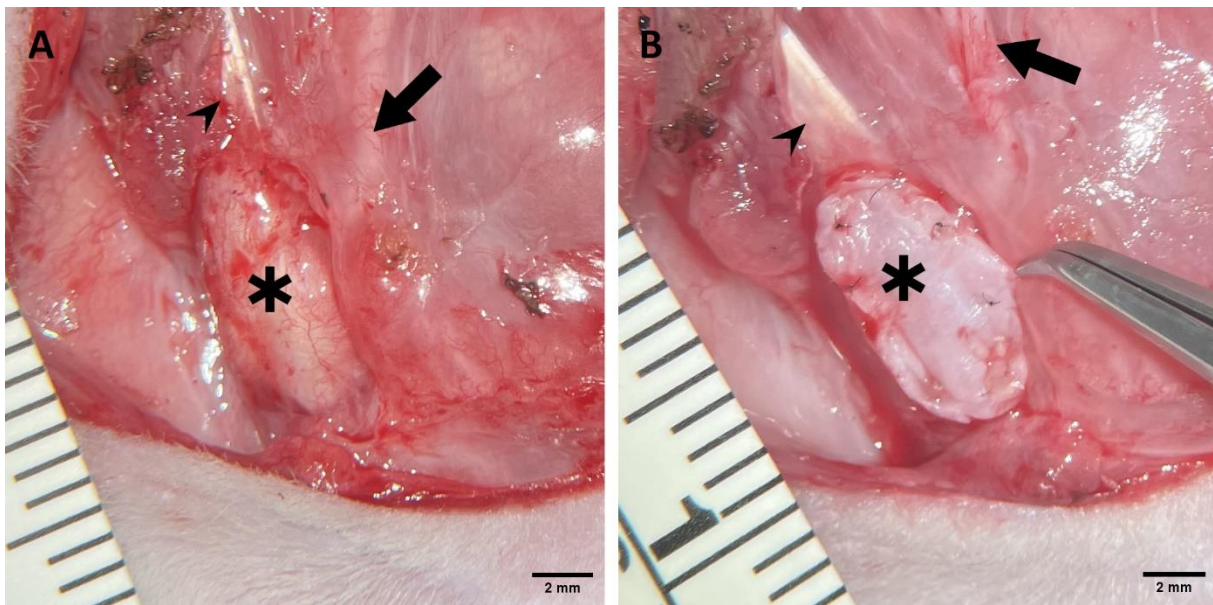

9  
10 **Supplemental Figure S2: The interface after a 12-week follow-up period.** (A) An epidermoid cyst can be seen on top of the dermal graft (\*). (B) After cyst  
11 removal, the graft (\*) appears fully revascularized and engrafted on top of the bicep's long head. The small arrows mark the bicep's proximal tendon, while the  
12 larger arrows point at the transferred ulnar nerve.

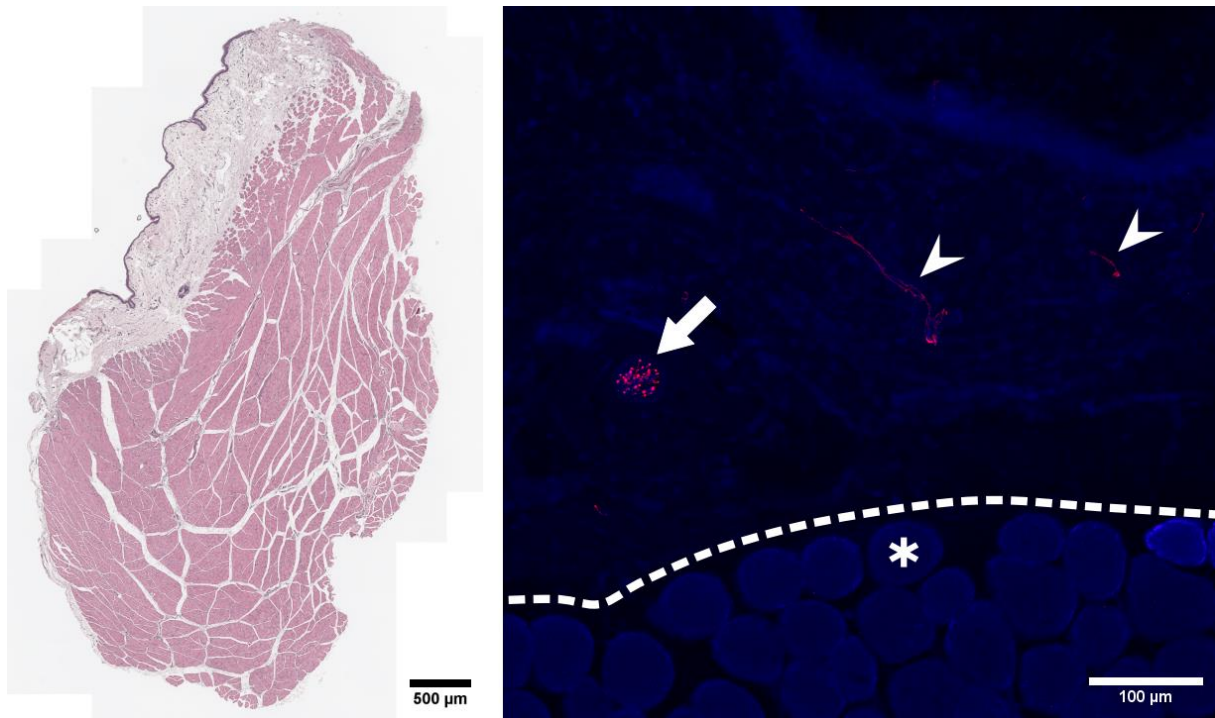

13

14 *Supplemental Figure S3: Morphological analysis of a muscle-skin sample. (Left) Hematoxylin and eosin stained cross section. The skin is fully engrafted and the*  
15 *muscle shows an intact architecture, thus suggesting successful motor reinnervation. (Right) Anti-neurofilament stained cross section of the musculocutaneous*  
16 *junction. The dashed line separates the muscle fibers (\*) from the dermal graft. Bundles of axons (large arrow) as well as individual fibers (small arrows) can be*  
17 *seen throughout the graft, suggesting sensory reinnervation.*

18

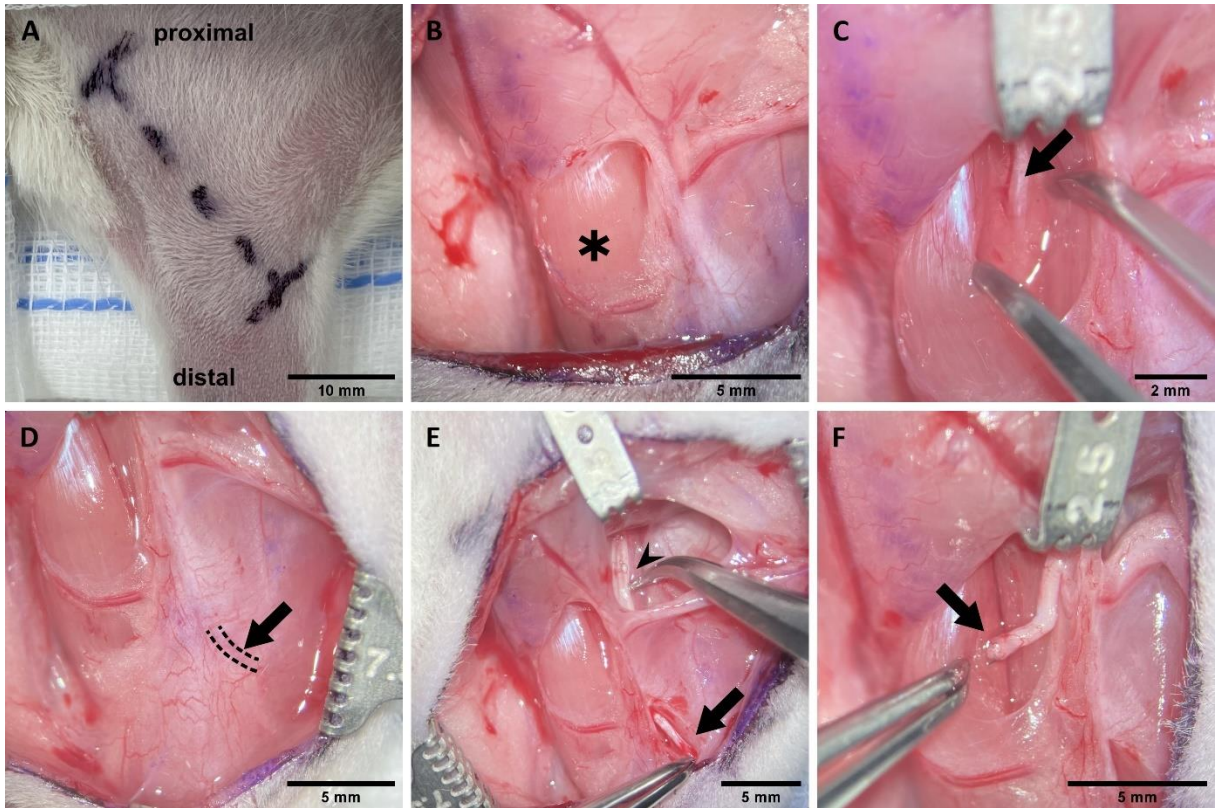

19

20

21

22

23

24

25

*Supplemental Figure S4: Overview of the surgical procedure. (A) View of the abducted upper extremity. An incision is made between the acromion and the medial epicondyle. (B) Dissection of the long head of the biceps (\*) and removal of its fascia. (C) Separation of the muscle's two heads, dissection of the long head's muscle branch (arrow) followed by its transection further proximal. (D) A faintly visible, accompanying vein (arrow) guides the ulnar nerve's dissection. (E) The nerve is exposed via a small window (large arrow), dissected, and transected before entering the cubital tunnel. The ulnar nerve is then located further proximal in the medial bicipital groove (small arrow) to mobilize it for the nerve transfer. (F) The ulnar nerve is transferred to the long head of the biceps (arrow).*

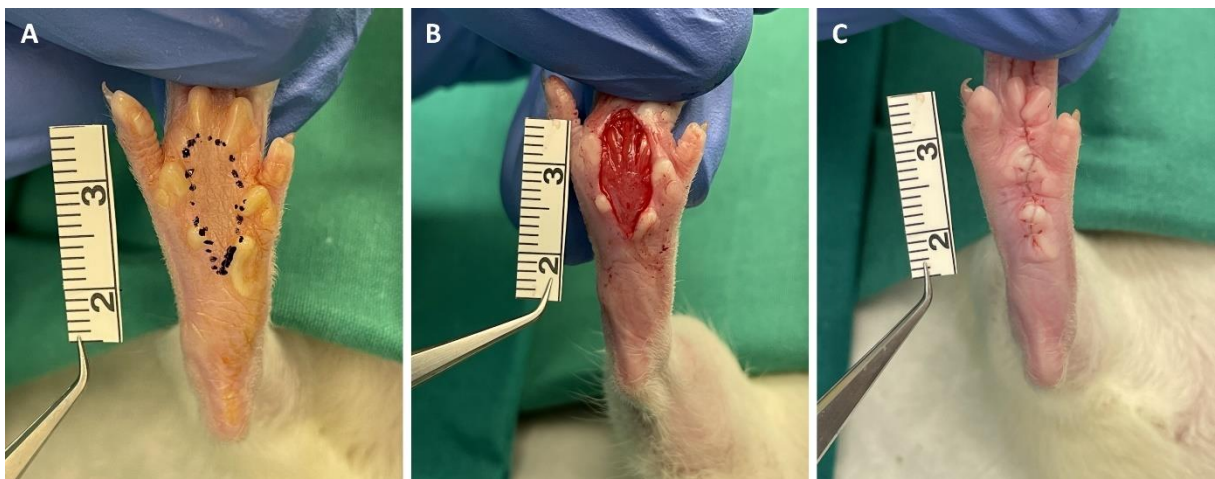

26

27

28

29

*Supplemental Figure S5: Harvesting of the glabrous dermal skin graft. (A) An approximately 1.5x0.5cm graft is marked between the walking pads. (B, C) The resulting defect can be easily closed primarily using 6-0 absorbable sutures.*

| Sample | only NF+ | NF/ChAT+ | Total |
|--------|----------|----------|-------|
| LHMB 1 | 180      | 132      | 312   |
| LHMB 2 | 203      | 181      | 384   |
| LHMB 3 | 167      | 175      | 342   |
| LHMB 4 | 164      | 110      | 274   |
| LHMB 5 | 220      | 180      | 400   |
| LHMB 6 | 271      | 155      | 426   |
| UN 1   | 2306     | 224      | 2530  |
| UN 2   | 2247     | 309      | 2556  |
| UN 3   | 2331     | 394      | 2725  |
| UN 4   | 2195     | 263      | 2458  |
| UN 5   | 2310     | 374      | 2684  |
| UN 6   | 1765     | 295      | 2060  |

30

31 *Supplemental Table S1: Axon counts for the peripheral nerves. (NF = neurofilament, ChAT = choline acetyltransferase, LHMB = long head's muscle branch, UN*

32 *= ulnar nerve)*

| <b>Sample</b> | <b>FB</b> | <b>RB</b> | <b>DL</b> |
|---------------|-----------|-----------|-----------|
| C8 1          | 820       | 69        | 55        |
| C8 3          | 832       | 235       | 197       |
| C8 4          | 993       | 149       | 135       |
| C8 5          | 980       | 292       | 235       |
| C8 6          | 813       | 59        | 47        |
| C8 7          | 923       | 52        | 44        |
| C8 8          | 1088      | 93        | 86        |
| C8 9          | 511       | 110       | 106       |
| T1 1          | 742       | 115       | 84        |
| T1 2          | 869       | 226       | 132       |
| T1 3          | 1134      | 335       | 254       |
| T1 4          | 760       | 81        | 66        |
| T1 5          | 752       | 130       | 98        |
| T1 6          | 1084      | 108       | 76        |
| T1 7          | 1348      | 132       | 114       |
| T1 8          | 1532      | 138       | 123       |
| T1 9          | 1840      | 487       | 403       |
| SC 1          | 177       | 0         | 0         |
| SC 2          | 176       | 1         | 0         |
| SC 3          | 140       | 4         | 2         |
| SC 4          | 253       | 0         | 0         |
| SC 5          | 200       | 0         | 0         |
| SC 6          | 114       | 0         | 0         |
| SC 7          | 203       | 0         | 0         |
| SC 8          | 206       | 0         | 0         |
| SC 9          | 115       | 0         | 0         |

33

34 *Supplemental Table S2: Cell counts for the dorsal root ganglia C8/T1 and spinal cords. (FB = fast blue, RB = Red Retrobeads™, DL = double labeled, SC = spinal*

35 *cord)*

| Animal | Monofilament 2 g   | Monofilament 4 g   | Monofilament 6 g   | Monofilament 8 g   | Monofilament 10 g  | Monofilament 15 g  |
|--------|--------------------|--------------------|--------------------|--------------------|--------------------|--------------------|
|        | [ $\mu$ V]         | [ $\mu$ V]         | [ $\mu$ V]         | [ $\mu$ V]         | [ $\mu$ V]         | [ $\mu$ V]         |
| E01    | 0.14               | 0.18               | 0.17               | 0.23               | <b><u>0.55</u></b> | <b><u>0.62</u></b> |
| E02    | 0.37               | 0.40               | 0.34               | <b><u>0.61</u></b> | <b><u>0.68</u></b> | -                  |
| E03    | 0.53               | <b><u>0.74</u></b> | 0.64               | <b><u>0.59</u></b> | 0.59               | -                  |
| E04    | 0.13               | 0.20               | 0.22               | 0.24               | <b><u>0.40</u></b> | <b><u>0.39</u></b> |
| E05    | 0.16               | 0.11               | 0.17               | 0.18               | 0.14               | 0.11               |
| E06    | 0.42               | <b><u>0.63</u></b> | <b><u>0.57</u></b> | <b><u>0.81</u></b> | <b><u>0.98</u></b> | <b><u>0.84</u></b> |
| E07    | 0.15               | 0.16               | 0.16               | 0.28               | <b><u>0.40</u></b> | <b><u>0.62</u></b> |
| E08    | 0.13               | 0.21               | 0.28               | 0.40               | 0.33               | <b><u>0.56</u></b> |
| E09    | 0.22               | 0.20               | 0.26               | 0.15               | 0.31               | 0.26               |
| E10    | 0.19               | 0.22               | 0.40               | 0.33               | <b><u>0.49</u></b> | <b><u>0.59</u></b> |
| E11    | 0.17               | 0.18               | 0.22               | 0.36               | 0.41               | <b><u>0.65</u></b> |
| E12    | 0.21               | <b><u>0.55</u></b> | <b><u>0.52</u></b> | <b><u>0.82</u></b> | <b><u>0.79</u></b> | <b><u>1.16</u></b> |
| E13    | <b><u>0.60</u></b> | <b><u>0.83</u></b> | <b><u>0.62</u></b> | <b><u>1.05</u></b> | <b><u>1.14</u></b> | <b><u>2.03</u></b> |
| C01    | 0.18               | 0.17               | 0.17               | 0.26               | 0.25               | <b><u>0.54</u></b> |
| C02    | 0.22               | <b><u>0.58</u></b> | <b><u>0.51</u></b> | <b><u>0.73</u></b> | <b><u>0.69</u></b> | <b><u>0.86</u></b> |
| C03    | 0.22               | 0.43               | 0.29               | <b><u>0.46</u></b> | <b><u>0.51</u></b> | <b><u>0.90</u></b> |
| C04    | 0.32               | 0.27               | <b><u>0.33</u></b> | <b><u>0.49</u></b> | <b><u>0.57</u></b> | <b><u>0.61</u></b> |
| C05    | 0.12               | 0.08               | 0.12               | 0.13               | 0.13               | <b><u>0.35</u></b> |
| C06    | 0.36               | <b><u>0.90</u></b> | 0.58               | <b><u>1.23</u></b> | <b><u>1.03</u></b> | <b><u>1.72</u></b> |
| C07    | 0.29               | 0.45               | 0.42               | <b><u>0.79</u></b> | <b><u>1.10</u></b> | <b><u>1.45</u></b> |
| C08    | 0.40               | <b><u>0.88</u></b> | 0.58               | <b><u>1.23</u></b> | <b><u>2.15</u></b> | <b><u>2.79</u></b> |
| C09    | 0.21               | 0.38               | <b><u>0.50</u></b> | <b><u>0.66</u></b> | <b><u>0.74</u></b> | <b><u>1.29</u></b> |
| C10    | 0.46               | 0.62               | 0.43               | <b><u>0.77</u></b> | <b><u>1.08</u></b> | <b><u>1.13</u></b> |

36

37 *Supplemental Table S3: Electroneurography results following mechanical stimulation with different monofilaments. Overview of the recorded maximum*  
38 *amplitudes for the experimental group with skin grafting (E) and the control group (C). Clearly identifiable signals are bold and underlined. 2 data points are*  
39 *missing due to an operating error during the recording sessions.*

40

| Animals | Vibration superficial | Vibration 1 mm | Undulating vibration | Consecutive tendon pulling | Constant tendon pulling | Perineural vibration |
|---------|-----------------------|----------------|----------------------|----------------------------|-------------------------|----------------------|
|         | [ $\mu$ V]            | [ $\mu$ V]     | [ $\mu$ V]           | [ $\mu$ V]                 | [ $\mu$ V]              | [ $\mu$ V]           |
| E01     | <u>1.12</u>           | <u>2.86</u>    | <u>3.15</u>          | -                          | -                       |                      |
| E02     | <u>1.81</u>           | <u>2.64</u>    | <u>2.52</u>          | -                          | -                       |                      |
| E03     | <u>3.20</u>           | <u>5.43</u>    | <u>2.78</u>          | -                          | -                       |                      |
| E04     | <u>1.80</u>           | <u>2.16</u>    | <u>1.96</u>          | -                          | -                       |                      |
| E05     | 0.15                  | <u>0.72</u>    | <u>0.38</u>          | -                          | -                       |                      |
| E06     | <u>2.34</u>           | <u>4.19</u>    | <u>2.03</u>          | -                          | -                       |                      |
| E07     | <u>1.29</u>           | <u>2.10</u>    | <u>1.39</u>          | -                          | -                       |                      |
| E08     | <u>0.91</u>           | <u>1.69</u>    | <u>1.06</u>          | -                          | -                       |                      |
| E09     | 0.33                  | <u>1.21</u>    | <u>0.61</u>          | -                          | -                       |                      |
| E10     | <u>1.74</u>           | <u>3.05</u>    | <u>2.60</u>          | -                          | -                       |                      |
| E11     | <u>1.05</u>           | <u>4.15</u>    | <u>1.13</u>          | -                          | -                       |                      |
| E12     | <u>1.73</u>           | <u>3.51</u>    | <u>1.59</u>          | -                          | -                       |                      |
| E13     | <u>2.43</u>           | <u>3.84</u>    | <u>1.20</u>          | -                          | -                       |                      |
| C01     | <u>0.98</u>           | <u>2.60</u>    | <u>1.39</u>          | <u>1.30</u>                | <u>1.10</u>             | 0.26                 |
| C02     | <u>2.65</u>           | <u>4.36</u>    | -                    | <u>0.85</u>                | <u>0.78</u>             | 0.17                 |
| C03     | <u>0.74</u>           | <u>2.59</u>    | <u>1.64</u>          | <u>1.61</u>                | <u>1.01</u>             | 0.20                 |
| C04     | <u>0.99</u>           | <u>3.02</u>    | <u>2.42</u>          | <u>1.24</u>                | <u>1.00</u>             | 0.26                 |
| C05     | <u>0.53</u>           | <u>1.30</u>    | <u>0.70</u>          | <u>0.31</u>                | 0.22                    | 0.19                 |
| C06     | <u>4.12</u>           | <u>1.60</u>    | <u>12.51</u>         | <u>5.39</u>                | <u>6.21</u>             | 0.66                 |
| C07     | <u>1.14</u>           | <u>6.14</u>    | <u>8.33</u>          | <u>4.23</u>                | <u>3.80</u>             | 0.64                 |
| C08     | <u>2.23</u>           | <u>9.57</u>    | -                    | <u>3.37</u>                | <u>3.00</u>             | 0.10                 |
| C09     | <u>3.15</u>           | <u>7.20</u>    | <u>5.05</u>          | <u>2.24</u>                | <u>1.71</u>             | 0.25                 |
| C10     | <u>1.59</u>           | <u>9.47</u>    | <u>4.42</u>          | <u>2.57</u>                | <u>2.72</u>             | 0.44                 |

41

42 *Supplemental Table S4: Electroneurography results following vibration and pulling of the tendon. Overview of the recorded maximum amplitudes for the*  
43 *experimental group with skin grafting (E) and the control group (C). Mechanical stimulation via manipulation of the tendon and perineural vibration was only*  
44 *performed in the control group. Clearly identifiable signals are bold and underlined. 2 data points are missing due to an operating error during the recording*  
45 *sessions.*

46

| Sample | n1 [ $\mu\text{m}$ ] | n2 [ $\mu\text{m}$ ] | n3 [ $\mu\text{m}$ ] | n4 [ $\mu\text{m}$ ] | n5 [ $\mu\text{m}$ ] |
|--------|----------------------|----------------------|----------------------|----------------------|----------------------|
| C8 1   | 5.06                 | 5.12                 | 5.31                 | 4.87                 | 5.12                 |
| C8 3   | 6.05                 | 5.77                 | 5.42                 | 4.59                 | 6.13                 |
| C8 4   | 5.77                 | 5.89                 | 5.41                 | 6.24                 | 4.79                 |
| C8 5   | 5.32                 | 5.78                 | 4.89                 | 5.5                  | 6.24                 |
| C8 6   | 4.78                 | 6.17                 | 5.89                 | 5.88                 | 4.25                 |
| C8 7   | 5.6                  | 5.46                 | 5.11                 | 5                    | 5.11                 |
| C8 8   | 5                    | 5.64                 | 5.73                 | 5.83                 | 3.84                 |
| C8 9   | 6.12                 | 5.67                 | 5.76                 | 5                    | 6.61                 |
| T1 1   | 6.11                 | 5.33                 | 3.36                 | 5.81                 | 6.64                 |
| T1 2   | 4.99                 | 4.97                 | 5.5                  | 6.25                 | 5.66                 |
| T1 3   | 5.21                 | 5.93                 | 5.15                 | 5.06                 | 6.32                 |
| T1 4   | 4.46                 | 5.24                 | 4.74                 | 4.51                 | 4.28                 |
| T1 5   | 6.99                 | 4.54                 | 4.9                  | 5.13                 | 6.78                 |
| T1 6   | 5.09                 | 4.78                 | 6.21                 | 5.36                 | 2.58                 |
| T1 7   | 4.41                 | 5.37                 | 4.39                 | 5.36                 | 5.31                 |
| T1 8   | 5.2                  | 5.4                  | 5.72                 | 5.02                 | 4.96                 |
| T1 9   | 4.31                 | 4.73                 | 5.34                 | 4.6                  | 5.1                  |
| SC 1   | 5.14                 | 5.51                 | 5.16                 | 5.99                 | 3.73                 |
| SC 2   | 5.38                 | 4.8                  | 4.37                 | 5.46                 | 4.68                 |
| SC 3   | 4.46                 | 5.56                 | 5.44                 | 5.33                 | 4.45                 |
| SC 4   | 6.89                 | 6.95                 | 6.06                 | 7.18                 | 6.42                 |
| SC 5   | 4.88                 | 6.18                 | 6.44                 | 5.77                 | 4.63                 |
| SC 6   | 4.17                 | 3.9                  | 2.45                 | 2.88                 | 5.17                 |
| SC 7   | 5.68                 | 6.31                 | 4.91                 | 4.85                 | 6.26                 |
| SC 8   | 4.09                 | 6.8                  | 5.6                  | 7.1                  | 6.29                 |
| SC 9   | 5.65                 | 5.71                 | 6.45                 | 5.46                 | 6.16                 |

47

48 *Supplemental Table S5: Nucleoli diameters. Five diameters were measured per sample. (SC = spinal cord)*

49
